# Supplementary material for: Density of tertiary lymphoid structures predicts clinical outcome in breast cancer brain metastasis
Source: PubMed Central journal article supplement — J Immunother Cancer. 2024 Jul 27;12(7):e009232. doi: 10.1136/jitc-2024-009232 (PMC11284839; doi:10.1136/jitc-2024-009232), 2024-07-27
Supplement: jitc-2024-009232supp001.pdf [file jitc-2024-009232supp001.pdf]

## Supplementary Table S1

Antibodies used in panel 1 of Figure 5 and panel 2 of Supplementary Figure S3

| Panel | Cycle | Marker               | Conjugate | Vendor      | Catalog    | Dilution |
|-------|-------|----------------------|-----------|-------------|------------|----------|
| 1     | 1     | Autofluorescence     | AF488     | None        | None       | None     |
| 1     | 1     | Autofluorescence     | AF555     | None        | None       | None     |
| 1     | 1     | TIM-3                | None      | Abcam       | ab241332   | 1/100    |
| 1     | 1     | Goat anti-rabbit IgG | AF647     | Abcam       | ab150083   | 1/200    |
| 1     | 2     | CD163                | AF488     | Abcam       | ab218293   | 1/100    |
| 1     | 2     | CD68                 | AF555     | CST         | 79594      | 1/100    |
| 1     | 2     | CD20                 | AF647     | eBioscience | 50-0202-80 | 1/100    |
| 1     | 3     | CD3D                 | AF555     | Abcam       | ab208514   | 1/100    |
| 1     | 3     | CD8a                 | AF647     | eBioscience | 50-0008-82 | 1/100    |
| 1     | 4     | PD-L1                | AF555     | Abcam       | ab213358   | 1/50     |
| 1     | 4     | PD-1                 | AF647     | Abcam       | ab201825   | 1/100    |
| 1     | 5     | pan-CK               | AF555     | CST         | 3478       | 1/200    |
| 1     | 5     | Foxp3                | AF647     | BioLegend   | 320113     | 1/50     |
| 2     | 1     | Cleaved Caspase-3    | None      | CST         | 9661       | 1/100    |
| 2     | 1     | BCL-6                | None      | GeneAb      | IHC029-100 | 1/100    |
| 2     | 1     | Goat anti-mouse IgG  | AF555     | Abcam       | ab150118   | 1/200    |
| 2     | 1     | Goat anti-rabbit IgG | AF647     | Abcam       | ab150083   | 1/200    |
| 2     | 2     | CD4                  | AF488     | Abcam       | ab196372   | 1/100    |
| 2     | 2     | TCF1/TCF7            | AF555     | CST         | 17404      | 1/100    |
| 2     | 2     | CXCR5                | AF647     | Abcam       | ab316179   | 1/100    |
| 2     | 3     | HLA-DR               | AF488     | BioLegend   | 307619     | 1/100    |
| 2     | 3     | CD8a                 | AF647     | eBioscience | 50-0008-82 | 1/100    |
| 2     | 4     | Ki-67                | AF488     | CST         | 11882      | 1/100    |
| 2     | 4     | pan-CK               | AF555     | CST         | 3478       | 1/200    |
| 2     | 4     | HLA-A                | AF647     | Abcam       | ab199837   | 1/200    |
| 2     | 5     | CD20                 | AF647     | eBioscience | 50-0202-80 | 1/100    |
| 2     | 5     | CD57                 | AF555     | BioLegend   | 393307     | 1/100    |

The code used for the analyses of the nomogram in Figure 4 is shared in the link below.

<https://gitee.com/tao-taos-warehouse/nomo.-r-score-sur.-r.git>

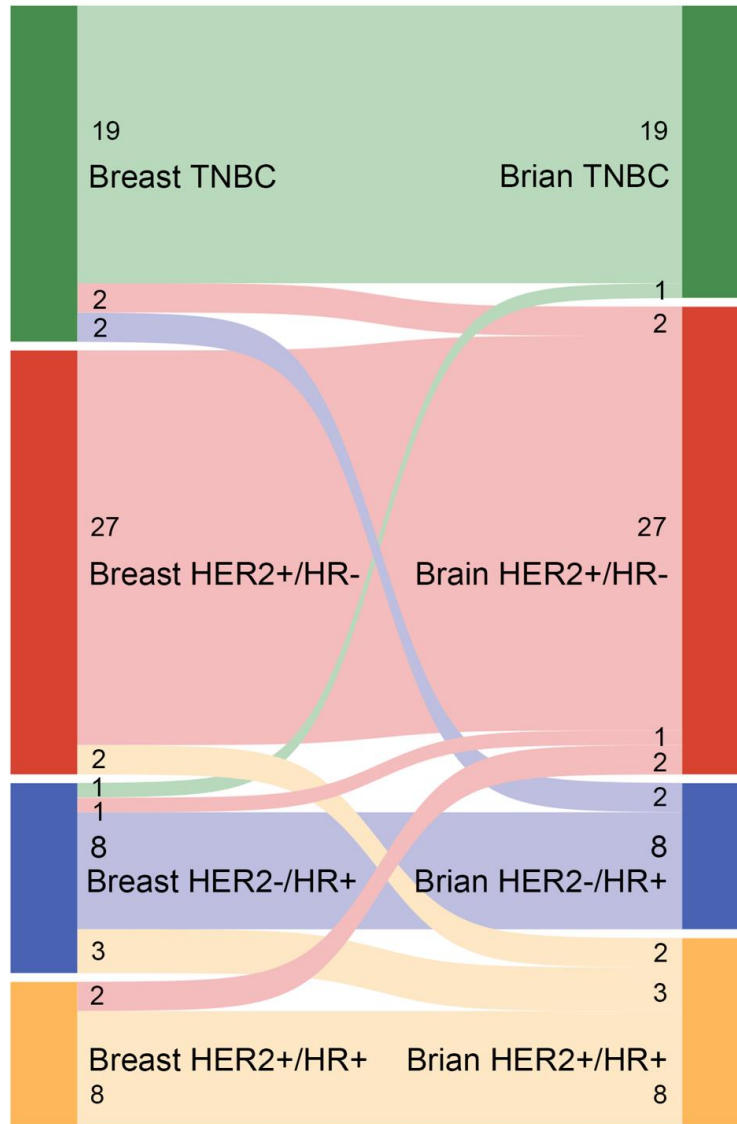

Supplementary Figure S1: Subtype switching. Width of the bands indicates number of patients crossing over. + = positive; - = negative; HR = hormonal receptor; HER2 = human epidermal growth factor receptor 2.

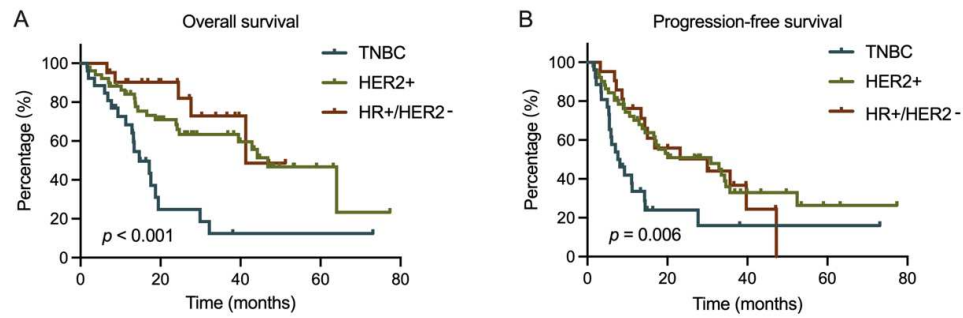

Supplementary Figure S2: Kaplan-Meier curves for overall survival (A) and progression-free survival (B) according to breast subtype. + = positive; - = negative; HR = hormonal receptor; HER2 = human epidermal growth factor receptor 2.

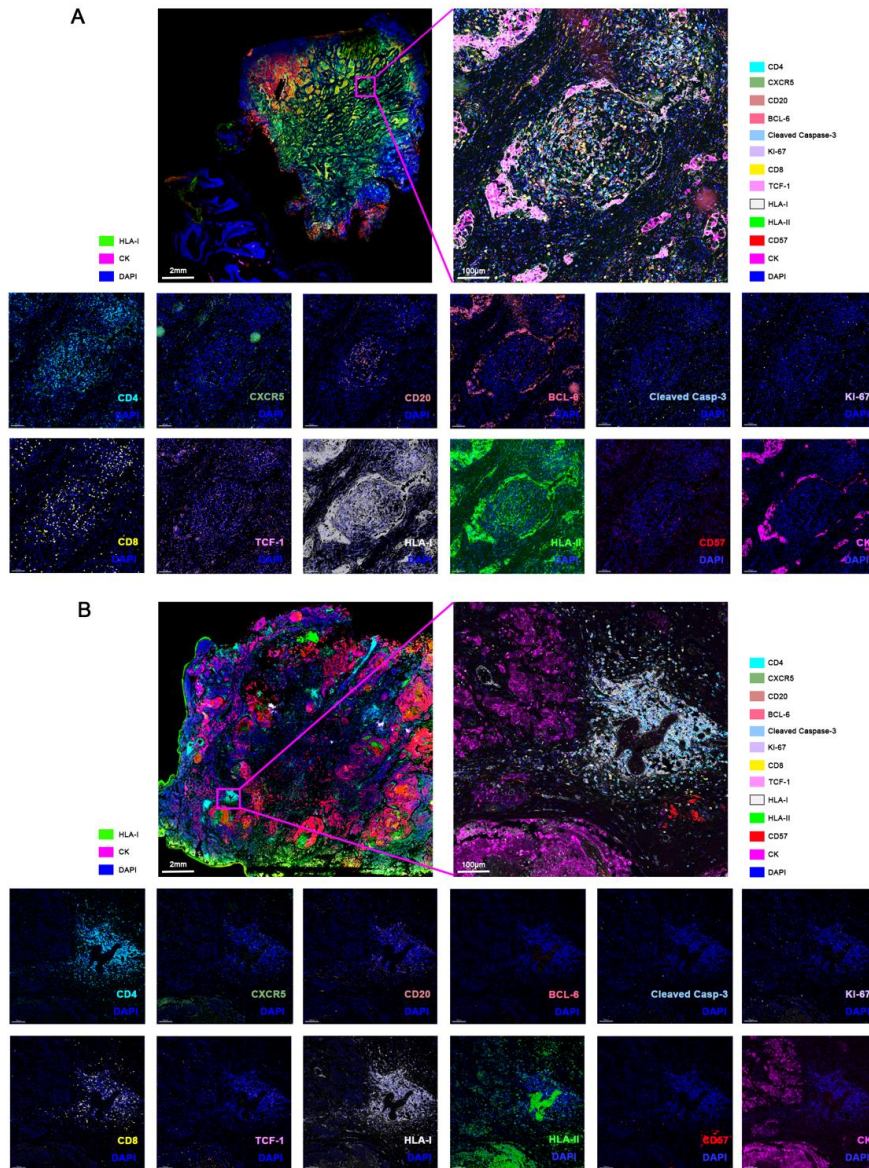

Supplementary Figure S3: Representative multiplex immunofluorescence images of case 1 (A) and case 2 (B) showing the positivity of CD4, CXCR5, CD20, BCL-6, Cleaved Caspase-3, Ki-67, CD8, TCF-1, HLA-I, HLA-II, CD57, and CK in intra-tumoral TLSs. Abbreviations: CD, cluster of differentiation; CXCR5, C-X-C motif chemokine receptor 5; BCL-6, BCL6 transcription repressor; HLA, histocompatibility antigen; TCF-1, T cell factor 1; CK, cytokeratin; DAPI, 4',6-diamidino-2-phenylindole.

Supplementary Table S2 The univariate analysis and multivariate analysis between clinicopathological characteristics and OS

| Variables                            |                         | Univariate analysis      |                | Multivariate analysis |                |
|--------------------------------------|-------------------------|--------------------------|----------------|-----------------------|----------------|
|                                      |                         | HR <sup>a</sup> (95% CI) | <i>p</i> value | HR (95% CI)           | <i>p</i> value |
| age at time of BCBM (years)          | <65                     | 0.443 (0.183-1.072)      | 0.071          | 0.335 (0.121-0.930)   | 0.036          |
|                                      | ≥65                     | Reference                | -              | Reference             | -              |
| Breast cancer subtype of BrM         | TNBC                    | 4.848 (1.781-13.193)     | 0.002          | 4.440 (1.505-13.100)  | 0.007          |
|                                      | HER2+                   | 1.648 (0.621-4.374)      | 0.315          | 2.488 (0.872-7.101)   | 0.088          |
|                                      | HR <sup>b</sup> +/HER2- | Reference                | -              | Reference             | -              |
| TLS score                            | 0                       | 4.414 (1.510-12.902)     | 0.007          | 3.249 (1.050-10.055)  | 0.041          |
|                                      | 1                       | 2.195 (0.636-7.572)      | 0.213          | 1.072 (0.288-3.997)   | 0.917          |
|                                      | 2                       | 1.270 (0.357-4.522)      | 0.712          | 0.529 (0.136-2.062)   | 0.359          |
|                                      | 3                       | Reference                | -              | Reference             | -              |
| KPS                                  | 90                      | 0.342 (0.127-0.926)      | 0.035          | 0.226 (0.071-0.722)   | 0.012          |
|                                      | 70-80                   | 1.133 (0.495-2.595)      | 0.768          | 0.980 (0.380-2.529)   | 0.967          |
|                                      | 60 or less              | Reference                | -              | Reference             | -              |
| De novo Stage IV breast cancer       | yes                     | 0.301 (0.156-0.578)      | <0.001         | 0.283 (0.129-0.620)   | 0.002          |
|                                      | no                      | Reference                | -              | Reference             | -              |
| Systemic therapy after BrM diagnosis | yes                     | 1.994 (0.911-4.364)      | 0.084          | 2.366 (0.960-5.831)   | 0.061          |
|                                      | no                      | Reference                | -              | Reference             | -              |
| Radiotherapy after BrM diagnosis     | yes                     | 1.224 (0.597-2.512)      | 0.581          | 1.185 (0.490-2.867)   | 0.707          |
|                                      | no                      | Reference                | -              | Reference             | -              |

OS = overall survival; HR<sup>a</sup> = hazard ratio; CI = confidence interval; HR<sup>b</sup> = hormone receptor; HER2 = epidermal growth factor receptor 2; TNBC: triple-negative breast cancer; KPS = Karnofsky performance status; TLS = tertiary lymphoid structure; BCBM = breast cancer brain metastasis; BrM = brain metastasis.

Supplementary Table S3 The univariate analysis and multivariate analysis between clinicopathological characteristics and PFS

| Variables                            |                         | Univariate analysis      |                | Multivariate analysis |                |
|--------------------------------------|-------------------------|--------------------------|----------------|-----------------------|----------------|
|                                      |                         | HR <sup>a</sup> (95% CI) | <i>p</i> value | HR (95% CI)           | <i>p</i> value |
| age at time of BCBM (years)          | <65                     | 0.576 (0.271-1.225)      | 0.152          | 0.580 (0.250-1.345)   | 0.204          |
|                                      | ≥65                     | Reference                | -              | Reference             | -              |
| Breast cancer subtype of BrM         | TNBC                    | 2.245 (1.121-4.495)      | 0.022          | 2.341 (1.079-5.080)   | 0.031          |
|                                      | HER2+                   | 0.938 (0.498-1.766)      | 0.842          | 1.561 (0.766-3.182)   | 0.220          |
|                                      | HR <sup>b</sup> +/HER2- | Reference                | -              | Reference             | -              |
| TLS score                            | 0                       | 5.190 (2.010-13.397)     | 0.001          | 4.268 (1.595-11.417)  | 0.004          |
|                                      | 1                       | 3.594 (1.276-10.121)     | 0.015          | 2.517 (0.859-7.379)   | 0.093          |
|                                      | 2                       | 1.893 (0.631-5.678)      | 0.255          | 1.003 (0.317-3.177)   | 0.996          |
|                                      | 3                       | Reference                | -              | Reference             | -              |
| KPS                                  | 90                      | 0.324 (0.157-0.669)      | 0.002          | 0.233 (0.101-0.535)   | 0.001          |
|                                      | 70-80                   | 0.678 (0.363-1.265)      | 0.222          | 0.622 (0.321-1.204)   | 0.159          |
|                                      | 60 or less              | Reference                | -              | Reference             | -              |
| De novo Stage IV breast cancer       | yes                     | 0.312 (0.172-0.564)      | <0.001         | 0.311 (0.156-0.619)   | 0.001          |
|                                      | no                      | Reference                | -              | Reference             | -              |
| Systemic therapy after BrM diagnosis | yes                     | 1.625 (0.816-3.236)      | 0.167          | 1.981 (0.911-4.310)   | 0.085          |
|                                      | no                      | Reference                | -              | Reference             | -              |
| Radiotherapy after BrM diagnosis     | yes                     | 0.787 (0.416-1.486)      | 0.460          | 0.594 (0.277-1.274)   | 0.181          |
|                                      | no                      | Reference                | -              | Reference             | -              |

PFS = progression-free survival; HR<sup>a</sup> = hazard ratio; CI = confidence interval; HR<sup>b</sup> = hormone receptor; HER2 = epidermal growth factor receptor 2; TNBC: triple-negative breast cancer; KPS = Karnofsky performance status; TLS = tertiary lymphoid structure; BCBM = breast cancer brain metastasis; BrM = brain metastasis.
